# Supplementary material for: The determinants of genetic diversity in butterflies
Source: PubMed Central journal article supplement (PMC6672018; doi:10.1038/s41467-019-11308-4), 2019-08-01
Supplement: 41467_2019_11308_MOESM4_ESM.pdf [file 41467_2019_11308_MOESM4_ESM.pdf]

## **Description of Additional Supplementary Files**

File Name: Supplementary Data 1

Description: Collection, ID and sex information for the butterfly specimens used for RNA sequencing.

File Name: Supplementary Data 2

Description: Gbif occurrence data used for estimating species ranges.

File Name: Supplementary Data 3

Description: Summaries of transcriptome assemblies and the number of 0D and 4D sites.

File Name: Supplementary Software 1

Description: Mathematica code for modeling the effect of selection on neutral diversity.
