# Supplementary material for: The determinants of genetic diversity in butterflies
Source: PubMed Central journal article supplement (PMC6672018; doi:10.1038/s41467-019-11308-4), 2019-08-01
Supplement: 41467_2019_11308_MOESM6_ESM.pdf [file 41467_2019_11308_MOESM6_ESM.pdf]

## Supplementary Data 3

The following GBIF occurrence data were used to compute area ranges for 38 species of European butterfly:

### References

- [1] de Vries H. Observation.org, Nature data from the Netherlands. Observation.org.; 2018. <https://doi.org/10.15468/5nilie>.
- [2] Shah M, Coulson S. Artportalen (Swedish Species Observation System). Version 92.143. ArtDatabanken; 2019. <https://doi.org/10.15468/kllkyl>.
- [3] Blindheim T. BioFokus. Version 1.966. Natural History Museum, University of Oslo.; 2019. <https://doi.org/10.15468/jxbhqx>.
- [4] Ranz J. Banco de Datos de la Biodiversidad de la Comunitat Valenciana. Biodiversity data bank of Generalitat Valenciana.; 2017. <https://doi.org/10.15468/b4yqdy>.
- [5] Iturribarria M. Programa de seguimiento de mariposas diurnas del País Vasco. Version 2.5. Basque Government.; 2018. <https://doi.org/10.15470/7wmd2y>.
- [6] Caritg R, Martínez de la Riva S. Artrópodes d'Andorra. Version 1.3. Centre d'estudis de la neu i de la muntanya d'Andorra (CENMA), Institut d'Estudis Andorrans.; 2016. <https://doi.org/10.15468/d9uwhe>.
- [7] Beja P, Figueira R, Corley M, Grosso-Silva JM, Ferreira S, Sousa P. EDP Foz Tua: Arthropoda - Environmental Impact Assessment [2006-2008]. Version 1.6. EDP - Energias de Portugal.; 2018. <https://doi.org/10.15468/jtdrhm>.

- [8] Vanreusel W, Herremans M, Vantieghem P, K G, Swinnen K, Desmet P. Waarnemingen.be - Butterfly occurrences in Flanders and the Brussels Capital Region, Belgium. Version 1.6. Natuurpunt.; 2018. <https://doi.org/10.15468/ezfbee>.
- [9] J B. The Distribution Atlas of Butterflies in Poland. Nicolaus Copernicus University of Torun; 2017. <https://doi.org/10.15468/yqzyas>.
- [10] Uribe F. BioBlitz Barcelona 2010-14. Version 1.8. Museu de Ciéncies Naturals de Barcelona.; 2018. <https://doi.org/10.15470/ssy7h3>.
- [11] Centre NBD. Butterflies of Ireland.; 2019. <https://doi.org/10.15468/l7h1bv>.
- [12] Maes D, Brosens D, Beck O, Van Dyck H, Desmet P. Vlinderdatabank - Butterflies in Flanders and the Brussels Capital Region, Belgium. Version 1.4. Research Institute for Nature and Forest (INBO).; 2017. <https://doi.org/10.15468/njgbmh>.
- [13] Telenius A, Shah M. Lepidoptera (Observations). GBIF-Sweden.; 2016. <https://doi.org/10.15468/ao0ljg>.
- [14] Calabuig I. Atlas survey of the Butterflies of Denmark.; 2016. <https://doi.org/10.15468/v5f2e2>.
- [15] Buchwald EC. Threatened species occurrences, Denmark 1991-2015. Version 1.4. Danish Nature Agency.; 2018. <https://doi.org/10.15468/5cpovj>.
- [16] Moeslund JE. Vegetation data from protected areas in Denmark (§3 in the Danish Nature Protection Act). Version 8.1. Department of Bioscience, Aarhus University; 2016. <https://doi.org/10.15468/ar7pbr>.
